# Supplementary material for: Phosphate functionalized activated carbon as an efficient metal-free electrocatalyst for the oxygen reduction reaction
Source: Royal Society of Chemistry journal article supplement (doi:10.1039/c5nj01270h), 2015-01-01
Supplement: c5nj01270h1.pdf [file c5nj01270h1.pdf]

# Phosphate functionalized activated carbon as an efficient metal-free electrocatalyst for oxygen reduction reaction

## Supporting Information

Shunyan Zhao,<sup>‡</sup> Chuanxi Li,<sup>‡</sup> Hui Huang,\* Yang Liu\* and Zhenhui Kang

Jiangsu Key Laboratory for Carbon-Based Functional Materials & Devices, Institute of Functional Nano & Soft Materials (FUNSOM), Soochow University, 199 Ren'ai Road, Suzhou, 215123, Jiangsu, PR China.

<sup>‡</sup> These authors contributed equally to this work.

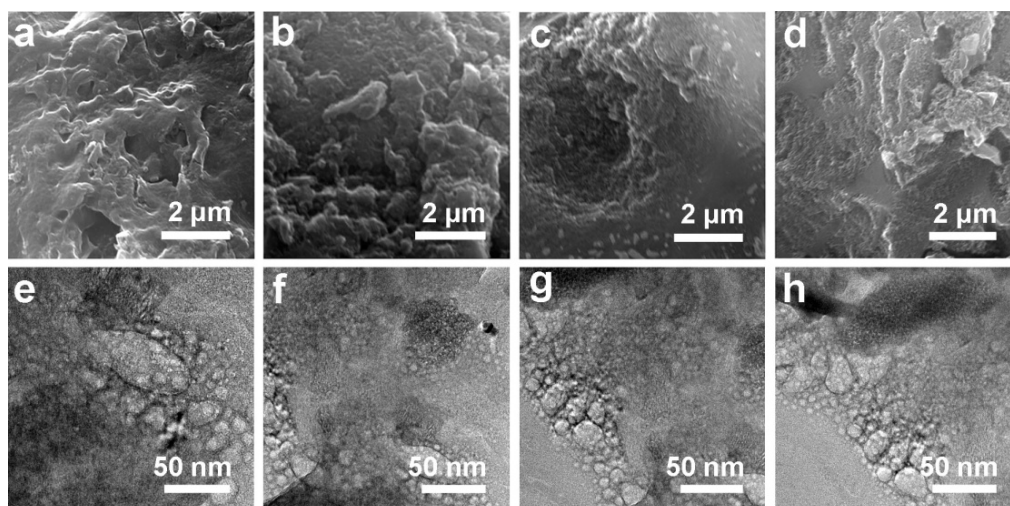

**Fig. S1** (a) SEM and (e) TEM images of AC, (b) SEM and (f) TEM images of PAC, (c) SEM and (g) TEM images of PAC-1 and (d) SEM and (h) TEM images of PAC-2.

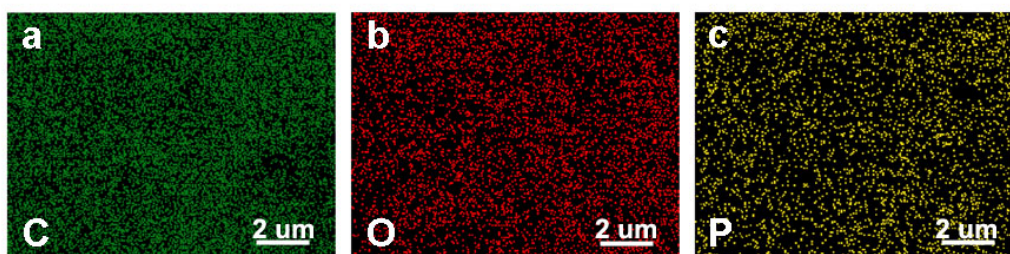

**Fig. S2** EDS element mapping images of (a) C, (b) O and (c) P elements of PAC-3.

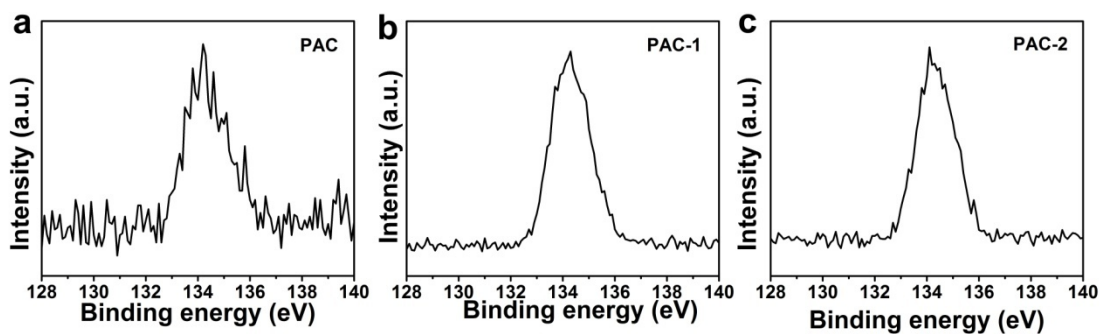

**Fig. S3** High-resolution P 2p spectra of (a) PAC, (b) PAC-1 and (c) PAC-2.

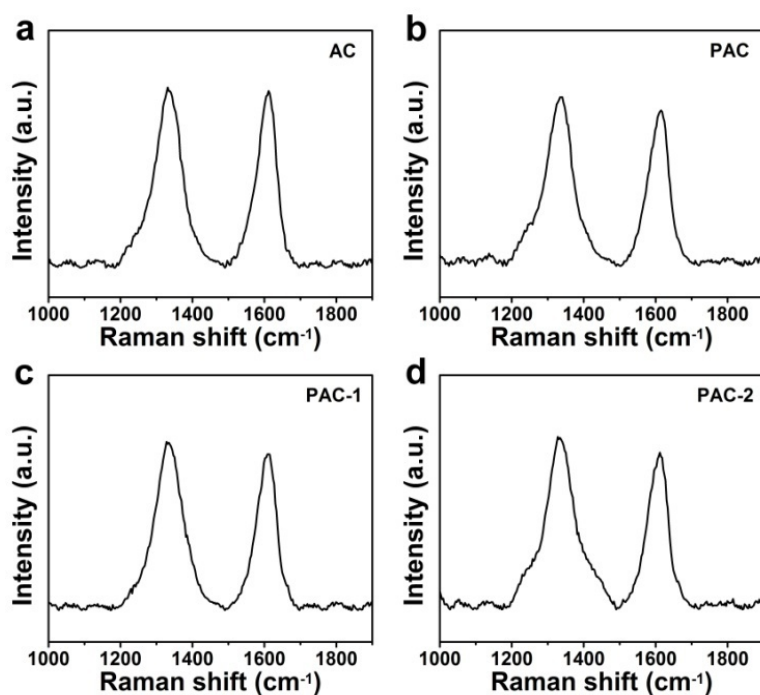

**Fig. S4** Raman spectra of (a) AC, (b) PAC, (c) PAC-1 and (d) PAC-2.

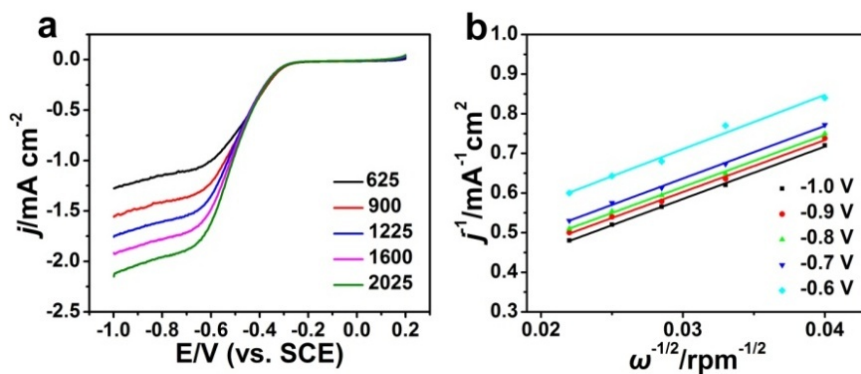

**Fig. S5** LSV curves of AC in O<sub>2</sub>-saturated 0.1 M KOH solution at various rotation speeds with 10 mV·s<sup>-1</sup>. (b) Koutecky-Levich plots of AC at different electrode potentials.

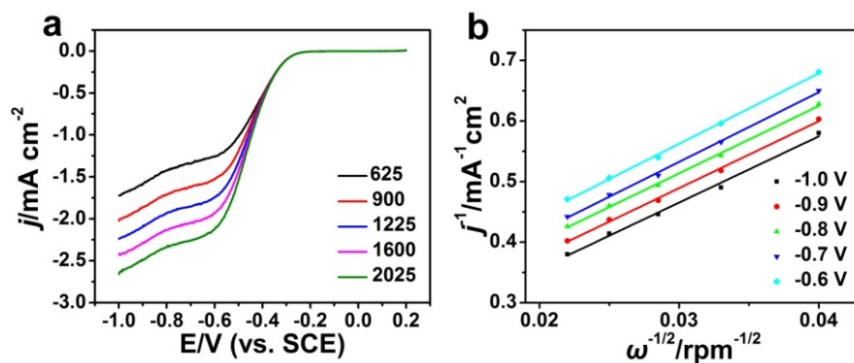

**Fig. S6** LSV curves of PAC in O<sub>2</sub>-saturated 0.1 M KOH solution at various rotation speeds with 10 mV·s<sup>-1</sup>. (b) Koutecky-Levich plots of PAC at different electrode potentials.

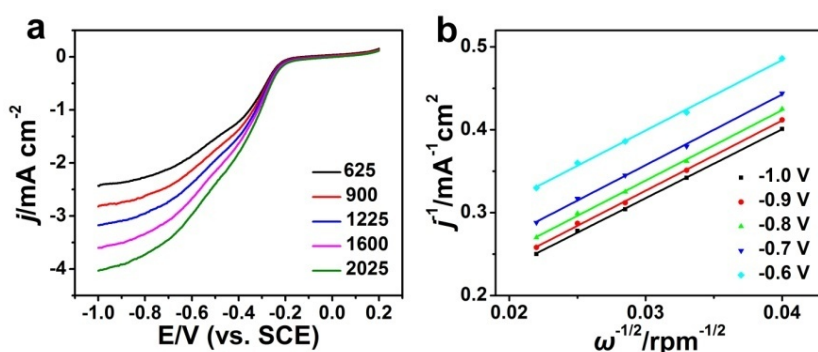

**Fig. S7** LSV curves of PAC-1 in O<sub>2</sub>-saturated 0.1 M KOH solution at various rotation speeds with 10 mV·s<sup>-1</sup>. (b) Koutecky-Levich plots of PAC-1 at different electrode potentials.

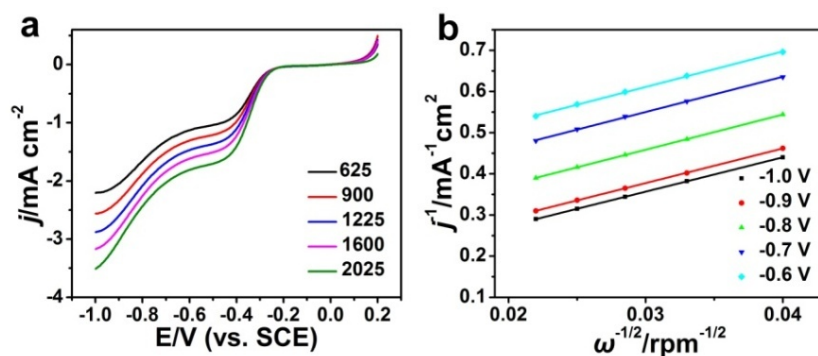

**Fig. S8** LSV curves of PAC-2 in O<sub>2</sub>-saturated 0.1 M KOH solution at various rotation speeds with 10 mV·s<sup>-1</sup>. (b) Koutecky-Levich plots of PAC-2 at different electrode potentials.

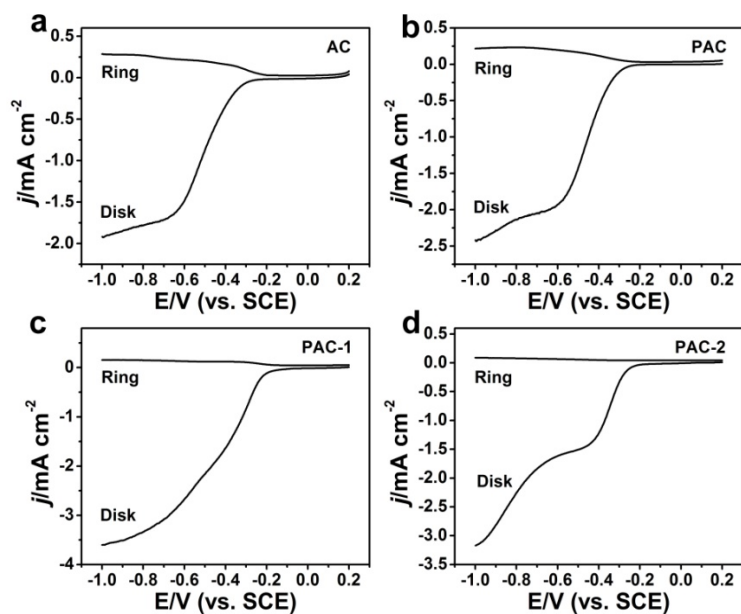

**Fig. S9** RRDE curves of (a) AC, (b) PAC, (c) PAC-1 and (d) PAC-2 in O<sub>2</sub>-saturated 0.1 M KOH solutions at 10 mV·s<sup>-1</sup> and 1600 rpm rotation speed.

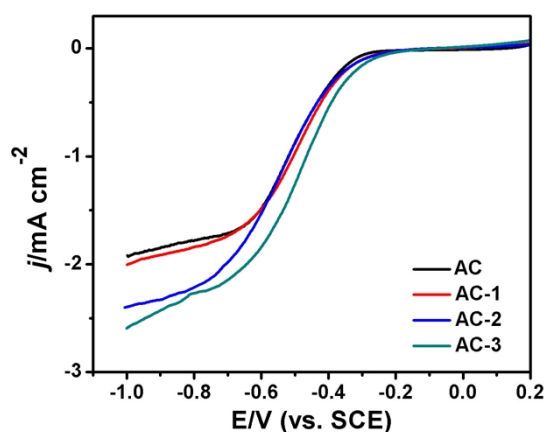

**Fig. S10** LSV curves of different AC samples treated with acid (AC-1), base (AC-2), acid and base (AC-3) in O<sub>2</sub>-saturated 0.1 M KOH solutions with 10 mV s<sup>-1</sup> and 1600 rpm rotation speed.

**Table S1.** The specific surface area and average pore size of different AC samples treated with acid (AC-1), base (AC-2), acid and base (AC-3).

|                                                         | AC-1  | AC-2  | AC-3  |
|---------------------------------------------------------|-------|-------|-------|
| Specific surface area (m <sup>2</sup> g <sup>-1</sup> ) | 662.3 | 712.9 | 856.5 |
| Average pore size (nm)                                  | 4.5   | 4.4   | 4.2   |

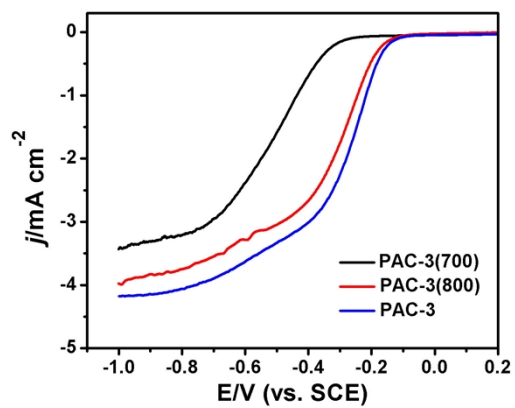

**Fig. S11** LSV curves of the PAC-3, PAC-3(700) and PAC-3(800) samples in  $\text{O}_2$ -saturated 0.1 M KOH solutions with  $10 \text{ mV s}^{-1}$  and 1600 rpm rotation speed.
